# Supplementary material for: Community-based interventions for detection and management of diabetes and hypertension in underserved communities: a mixed-methods evaluation in Brazil, India, South Africa and the USA
Source: PubMed Central journal article supplement — BMJ Glob Health. 2020 Jun 4;5(6):e001959. doi: 10.1136/bmjgh-2019-001959 (PMC7279660; doi:10.1136/bmjgh-2019-001959), 2020-06-04
Supplement: bmjgh-2019-001959supp003.pdf [file bmjgh-2019-001959supp003.pdf]

## Supplementary File 3 – Health System summary, by country

| Country   | Health system summary                                                                                                                                                                                                                                                                                                                                                                                                                                                                                                                                                                                                                                                                                                                                                                                                                                                                                                                                                                                                                                                                                                                                                                                                                                                                                                                                                                                                                                                                                                                                                                                                                                                                                                                                                                                                                                                                                                                                        |
|-----------|--------------------------------------------------------------------------------------------------------------------------------------------------------------------------------------------------------------------------------------------------------------------------------------------------------------------------------------------------------------------------------------------------------------------------------------------------------------------------------------------------------------------------------------------------------------------------------------------------------------------------------------------------------------------------------------------------------------------------------------------------------------------------------------------------------------------------------------------------------------------------------------------------------------------------------------------------------------------------------------------------------------------------------------------------------------------------------------------------------------------------------------------------------------------------------------------------------------------------------------------------------------------------------------------------------------------------------------------------------------------------------------------------------------------------------------------------------------------------------------------------------------------------------------------------------------------------------------------------------------------------------------------------------------------------------------------------------------------------------------------------------------------------------------------------------------------------------------------------------------------------------------------------------------------------------------------------------------|
| Brazil[1] | <ul style="list-style-type: none"> <li>• <b>Health expenditure per capita (in Purchasing Power Parity [PPP], international dollars [int\$]):</b> 1,472.2 (out-of-pocket expenditure per capita: 404.2);[3]</li> <li>• <b>Delivery structure:</b> complex network of public and private providers, ranging from single doctors to specialty and multispecialty tertiary care hospitals;</li> <li>• <b>Physicians per 1,000 population in 2018:</b> 2.1;[4]</li> <li>• <b>Nursing and midwifery per 1,000 population:</b> 9.7;[4]</li> <li>• <b>Government role:</b> the Brazilian public health system, the Unified Health System (SUS), is managed, financed, and provided by all levels of government;</li> <li>• <b>Private insurance role:</b> complementary role;</li> <li>• <b>Healthcare Access and Quality (HAQ) Index<sup>†</sup>:</b> 63.8;[5]</li> <li>• <b>Primary care:</b> primary health care (PHC) facilities offer both curative and preventive services; PHC facilities are mainly public; Family Health Care teams and the Basic Health Units are the first point of contact between the community and a health provider;</li> <li>• <b>Primary care team:</b> doctor, nurse, nurse assistant, and community health workers; Each the team is responsible for providing primary care to 3–4000 people in a defined geographic area, and each community health worker looks after 750 people in the community; The team can also incorporate oral health teams (dentists and dental technicians);</li> <li>• <b>Primary care service fee:</b> services at government facilities, including preventive and primary care, diagnostic services, and outpatient and inpatient hospital care, are delivered free of charge; Medications on the essential drug list are free, while other prescription drugs are purchased from private pharmacies.</li> </ul>                                                                                    |
| India[1]  | <ul style="list-style-type: none"> <li>• <b>Health expenditure per capita (in PPP, int\$):</b> 253.3 (out-of-pocket expenditure per capita: 158.1);[3]</li> <li>• <b>Delivery structure:</b> complex network of public and private providers, ranging from single doctors to specialty and multispecialty tertiary care hospitals;</li> <li>• <b>Physicians per 1,000 population in 2017:</b> 0.8;[4]</li> <li>• <b>Nursing and midwifery per 1,000 population:</b> 2.1;[4]</li> <li>• <b>Government role:</b> financing, legislation, and regulation by central government; financing, regulation, and direct provision of services by state governments;</li> <li>• <b>Private insurance role:</b> limited role providing substitutive coverage for the upper class urban population;</li> <li>• <b>Healthcare Access and Quality (HAQ) Index<sup>†</sup>:</b> 41.2;[5]</li> <li>• <b>Primary care:</b> PHC facilities offer both curative and public health programmes, with a strong focus on maternal and child health; PHC facilities are mainly public; Some private, especially in urban areas; The primary health center is the first point of contact between a village community and a medical officer and provides curative and preventive services to 20,000 to 30,000 people;</li> <li>• <b>Primary care team:</b> primary care physician, mid-level provider, auxiliary nurse midwife (ANMs), multipurpose worker (MPWs), and accredited social health activists (ASHAs);</li> <li>• <b>Primary care service fee:</b> services at government facilities, including preventive and primary care, diagnostic services, and outpatient and inpatient hospital care, are delivered free of charge; Primary care services within the private sector are covered by private insurances or out-of-pocket payments; Medications on the essential drug list are free, while other prescription drugs are purchased from private pharmacies.</li> </ul> |

|                      |                                                                                                                                                                                                                                                                                                                                                                                                                                                                                                                                                                                                                                                                                                                                                                                                                                                                                                                                                                                                                                                                                                                                                                                                                                                                                                                                                                                                                                                                                                                                                                                                                                                                                                                                                                                                                                                                              |
|----------------------|------------------------------------------------------------------------------------------------------------------------------------------------------------------------------------------------------------------------------------------------------------------------------------------------------------------------------------------------------------------------------------------------------------------------------------------------------------------------------------------------------------------------------------------------------------------------------------------------------------------------------------------------------------------------------------------------------------------------------------------------------------------------------------------------------------------------------------------------------------------------------------------------------------------------------------------------------------------------------------------------------------------------------------------------------------------------------------------------------------------------------------------------------------------------------------------------------------------------------------------------------------------------------------------------------------------------------------------------------------------------------------------------------------------------------------------------------------------------------------------------------------------------------------------------------------------------------------------------------------------------------------------------------------------------------------------------------------------------------------------------------------------------------------------------------------------------------------------------------------------------------|
| South Africa[2]      | <ul style="list-style-type: none"> <li>• <b>Health expenditure per capita (in PPP, int\$):</b> 1,097.8 (out-of-pocket expenditure per capita: 85.3);[3]</li> <li>• <b>Delivery structure:</b> complex network of public and private providers, ranging from single doctors to specialty and multispecialty tertiary care hospitals;</li> <li>• <b>Physicians per 1,000 population in 2017:</b> 0.9;[4]</li> <li>• <b>Nursing and midwifery per 1,000 population:</b> 3.5;[4]</li> <li>• <b>Government role:</b> government-funded healthcare is available to all citizens regardless of their income or employment status;</li> <li>• <b>Private insurance role:</b> limited role providing substitutive coverage for the upper class urban population;</li> <li>• <b>Primary care:</b> PHC facilities are mainly public; Some private; Public services are provided through a nurse-based, doctor-supported infrastructure of clinics and community health centers, available within 5kms to more than 90% of the population, and free at the point of use; Ward-based outreach teams and the community health centers are the first point of contact between the community and a health provider;</li> <li>• <b>Healthcare Access and Quality (HAQ) Index<sup>†</sup>:</b> 49.7;[5]</li> <li>• <b>Primary care team:</b> clinical nurse practitioners might be supported by doctors, and in larger clinics, a broader multi-professional team consisting typically of nurses, doctor(s), pharmacist, allied health professionals and lay counsellors can support the staff. Care is supported by an emerging system of community-based outreach teams consisting of community health workers.</li> <li>• <b>Primary care service fee:</b> services at public facilities are free of charge; Fee-for-service for care provided by private general practitioners.</li> </ul> |
| The United States[1] | <ul style="list-style-type: none"> <li>• <b>Health expenditure per capita (in PPP, int\$):</b> 10,246.1 (out-of-pocket expenditure per capita: 1,126.3);[3]</li> <li>• <b>Delivery structure:</b> network of private providers, ranging from primary care to outpatient specialist care and tertiary care hospitals;</li> <li>• <b>Physicians per 1,000 population in 2016:</b> 2.6;[4]</li> <li>• <b>Nursing and midwifery per 1,000 population:</b> 8.5;[4]</li> <li>• <b>Government role:</b> shared responsibility; Medicare: age 65+, some disabled; Medicaid: some low-income; for those without employer coverage, state-level insurance exchanges with income-based subsidies;</li> <li>• <b>Private insurance role:</b> primary private voluntary insurance covers most population; Supplementary for Medicare;</li> <li>• <b>Primary care:</b> PHC facilities are private;</li> <li>• <b>Healthcare Access and Quality (HAQ) Index<sup>†</sup>:</b> 88.7;[5]</li> <li>• <b>Primary care team:</b> primary care physician; Practices – particularly large ones – often include nurses and other clinical staff;</li> <li>• <b>Primary care service fee:</b> fee-for-service.</li> </ul>                                                                                                                                                                                                                                                                                                                                                                                                                                                                                                                                                                                                                                                                             |

<sup>†</sup>HAQ Index Provides a summary measure of personal healthcare access and quality for a given location. This measure is based on risk-standardized mortality rates or mortality-to-incidence ratios from causes that, in the presence of quality healthcare, should not result in death – also known as amenable mortality. HAQ Index performance is shown on a scale of 0 to 100, with 0 reflecting the worst observed levels across countries from 1990 to 2016 and 100 being the best observed during this time.

[1] The Commonwealth Fund. International Health Care System Profiles. Available from <https://international.commonwealthfund.org/countries>. (Accessed March 14th, 2020).

[2] World Health Organization. Primary health care systems (PRIMASYS): case study from South Africa, abridged version. Geneva: World Health Organization; 2017. Available from: <https://www.who.int/alliance-hpsr/projects/primasys/en/>. (Accessed March 14th, 2020).

[3] World Health Organization. Global Health Observatory data repository. Geneva: World Health Organization. Available from: <https://apps.who.int/gho/data/node.home>. (Accessed March 20<sup>th</sup> 2020).

[4] World Health Organization. The 2018 update, Global Health Workforce Statistics. Geneva: World Health Organization, 2018. Available from: <http://www.who.int/hrh/statistics/hwfstats/>. (Accessed March 22<sup>th</sup> 2020).

[5] Fullman N, Murray CJ, Lozano R, et al. Measuring performance on the Healthcare Access and Quality Index for 195 countries and territories and selected subnational locations: a systematic analysis from the Global Burden of Disease Study 2016. *The Lancet* 2018; 391:2236–2271. doi: 10.1016/S0140-6736(18)30994-2.
