# Supplementary material for: Community-based interventions for detection and management of diabetes and hypertension in underserved communities: a mixed-methods evaluation in Brazil, India, South Africa and the USA
Source: PubMed Central journal article supplement — BMJ Glob Health. 2020 Jun 4;5(6):e001959. doi: 10.1136/bmjgh-2019-001959 (PMC7279660; doi:10.1136/bmjgh-2019-001959), 2020-06-04
Supplement: bmjgh-2019-001959supp004.pdf [file bmjgh-2019-001959supp004.pdf]

## Supplementary File 4 – HealthRise Timeline, By Country

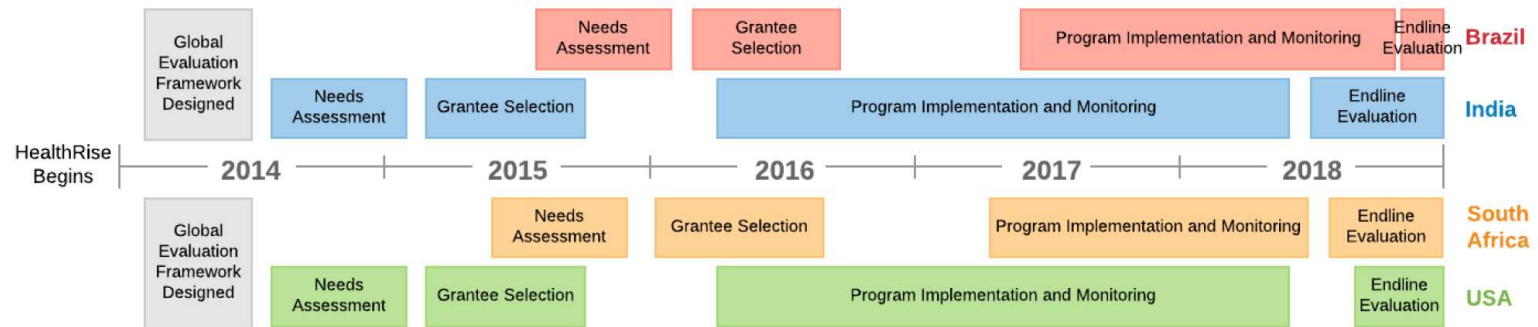

**Timeline for key components of HealthRise, by country, 2014-2018.** Country-specific components are color-coded, while global events (i.e., onset of the international HealthRise project and global evaluation framework development) are not color-coded.
