# Supplementary material for: Community-based interventions for detection and management of diabetes and hypertension in underserved communities: a mixed-methods evaluation in Brazil, India, South Africa and the USA
Source: PubMed Central journal article supplement — BMJ Glob Health. 2020 Jun 4;5(6):e001959. doi: 10.1136/bmjgh-2019-001959 (PMC7279660; doi:10.1136/bmjgh-2019-001959), 2020-06-04
Supplement: bmjgh-2019-001959supp006.pdf [file bmjgh-2019-001959supp006.pdf]

## Supplementary File 5 – Monitoring Indicators

One component of the HealthRise evaluation was a process evaluation, conducted to provide timely information on the progress of program execution and to accumulate longitudinal information for evaluation of program impact.

IHME collaborated with HealthRise grantees and country partners to develop a series of monitoring indicators tracking program processes, outputs and health outcomes. The set of monitoring indicators collected, and the specification of these indicators, varied by location in order to accommodate the differences in HealthRise implementation programs and local context.

HealthRise grantees provided program monitoring data to IHME on a regular basis during program implementation, either directly or through HealthRise country partners. IHME collated and processed the monitoring data and provided reports summarizing program activities to HealthRise partners.

Table SA1.1 provides the color-coding from monitoring indicators. Table SA1.2 broadly summarizes monitoring indicator availability by grantee. Figures SA1.1-SA1.4 summarizes the number of HealthRise participants in different stages of the programme in each country. Tables SA1.3 – SA1.11 provide more detailed indicator specification and indicator values for each HealthRise location.

Table SA1.1 – Monitoring indicator color-coding

| Types    | Indicators included                                                                                                                                                                                                                                                                 |
|----------|-------------------------------------------------------------------------------------------------------------------------------------------------------------------------------------------------------------------------------------------------------------------------------------|
| Process  | Health workers trained, risk assessments, screening events, meetings, groups started, awareness activities                                                                                                                                                                          |
| Outputs  | Screened, measured, diagnosed, new patients, enrolled, follow up, number of measures available                                                                                                                                                                                      |
| Outcomes | Average Systolic Blood Pressure (SBP)/haemoglobin A1c (A1c), hypertension control (SBP < 140mmHg and Diastolic Blood Pressure (DBP) < 90mmHg), diabetes control (A1c < 8%), 10% change in SBP and A1c, changes in blood pressure (BP) and blood glucose (BG) measurements category. |

Table SA1.2 – Monitoring indicator availability overview

| Key Indicators                                                                                                 | Brazil        |                      | India  |         | South Africa   |               | United States |             |                 |
|----------------------------------------------------------------------------------------------------------------|---------------|----------------------|--------|---------|----------------|---------------|---------------|-------------|-----------------|
|                                                                                                                | Teofilo Otoni | Vitoria da Conquista | Shimla | Udaipur | Pixley ka Seme | uMgungundlovu | Ramsey County | Rice County | Hennepin County |
| Number of health workers trained                                                                               | ✓             | ✓                    | ✓      | ✓       | ✓              | ✓             | ✓             | ✓           | ✓               |
| Number of community health workers trained                                                                     | ✓             | ✓                    | ✓      | ✓       | ✓              | ✓             | ✓             | ✓           | ✓               |
| Number of risk assessments conducted                                                                           | -             | -                    | -      | -       | ✓              | ✓             | -             | -           | -               |
| Number of public screening events or health fairs                                                              | ✓             | ✓                    | ✓      | ✓       | ✓              | ✓             | -             | -           | -               |
| Number of support group meetings held                                                                          | -             | -                    | ✓      | ✓       | ✓              | ✓             | -             | -           | -               |
| Number of support groups started                                                                               | -             | -                    | -      | -       | ✓              | ✓             | -             | -           | -               |
| Number of individuals who attended support groups                                                              | ✓             | -                    | -      | ✓       | -              | -             | -             | -           | -               |
| Number of individuals screened for hypertension                                                                | ✓             | ✓                    | ✓      | ✓       | ✓              | ✓             | -             | -           | -               |
| Number of individuals screened for diabetes                                                                    | ✓             | ✓                    | ✓      | ✓       | ✓              | ✓             | -             | -           | -               |
| Number of individuals identified as having elevated BP levels (SBP ≥140mmHg or DBP ≥90mmHg) based on screening | ✓             | ✓                    | ✓      | ✓       | ✓              | ✓             | -             | -           | -               |
| Number of individuals identified as having elevated BG levels based on screening                               | ✓             | ✓                    | ✓      | ✓       | ✓              | ✓             | -             | -           | -               |
| Number of individuals enrolled in HealthRise program for hypertension (HTN)                                    | ✓             | ✓                    | ✓      | ✓       | ✓              | ✓             | ✓             | ✓           | ✓               |
| Number of individuals enrolled in HealthRise program for diabetes (DM)                                         | ✓             | ✓                    | ✓      | ✓       | ✓              | ✓             | ✓             | ✓           | ✓               |

| Key Indicators                                                                                                                          | Brazil        |                      | India  |         | South Africa   |               | United States |             |                 |
|-----------------------------------------------------------------------------------------------------------------------------------------|---------------|----------------------|--------|---------|----------------|---------------|---------------|-------------|-----------------|
|                                                                                                                                         | Teofilo Otoni | Vitoria da Conquista | Shimla | Udaipur | Pixley ka Seme | uMgungundlovu | Ramsey County | Rice County | Hennepin County |
| Number of individuals with confirmed diagnosis of HTN prescribed pharmacotherapy treatment                                              | ✓             | ✓                    | ✓      | ✓       | ✓              | ✓             | -             | -           | -               |
| Number of individuals with confirmed diagnosis of DM prescribed pharmacotherapy treatment                                               | ✓             | ✓                    | ✓      | ✓       | ✓              | ✓             | -             | -           | -               |
| Average number of follow-up visits for HTN patients                                                                                     | ✓             | ✓                    | ✓      | ✓       | -              | -             | -             | -           | -               |
| Average number of follow-up visits for DM patients                                                                                      | ✓             | ✓                    | ✓      | ✓       | -              | -             | -             | -           | -               |
| Number of individuals who received a confirmatory diagnosis for HTN                                                                     | ✓             | ✓                    | ✓      | ✓       | ✓              | ✓             | -             | -           | -               |
| Number of individuals who received a confirmatory diagnosis for DM                                                                      | ✓             | ✓                    | ✓      | ✓       | ✓              | ✓             | -             | -           | -               |
| Number of individuals enrolled for HTN with their BP under control (SBP < 140mmHg and DBP < 90mmHg) as of their most recent measurement | ✓             | ✓                    | ✓      | ✓       | ✓              | ✓             | ✓             | ✓           | ✓               |
| Number of individuals enrolled for DM with their BG levels under control (A1c < 8%) as of their most recent measurement                 | ✓             | ✓                    | ✓      | ✓       | ✓              | ✓             | ✓             | ✓           | ✓               |
| Number of individuals enrolled for HTN with a decrease of 10% or more in SBP                                                            | ✓             | ✓                    | ✓      | ✓       | ✓              | ✓             | ✓             | ✓           | ✓               |
| Number of individuals enrolled for DM with a decrease of 10% or more in BG levels                                                       | ✓             | ✓                    | -      | -       | -              | -             | ✓             | ✓           | ✓               |
| Number of individuals enrolled for HTN with an increase of 10% or more in SBP                                                           | ✓             | ✓                    | ✓      | ✓       | ✓              | ✓             | ✓             | ✓           | ✓               |
| Number of individuals enrolled for DM with an increase of 10% or more in BG levels                                                      | ✓             | ✓                    | -      | -       | -              | -             | ✓             | ✓           | ✓               |

| Key Indicators                                                                      | Brazil        |                      | India  |         | South Africa   |               | United States |             |                 |
|-------------------------------------------------------------------------------------|---------------|----------------------|--------|---------|----------------|---------------|---------------|-------------|-----------------|
|                                                                                     | Teofilo Otoni | Vitoria da Conquista | Shimla | Udaipur | Pixley ka Seme | uMgungundlovu | Ramsey County | Rice County | Hennepin County |
| Average change in SBP for individuals enrolled for HTN                              | ✓             | ✓                    | ✓      | ✓       | ✓              | ✓             | ✓             | ✓           | ✓               |
| Average change in BG levels for individuals enrolled for DM                         | ✓             | ✓                    | -      | -       | -              | -             | ✓             | ✓           | ✓               |
| Number of patients enrolled for HTN who transitioned into a lower BP category       | ✓             | ✓                    | ✓      | ✓       | ✓              | ✓             | ✓             | ✓           | ✓               |
| Number of patients enrolled for DM who transitioned into a lower BG category        | ✓             | ✓                    | -      | -       | -              | -             | ✓             | ✓           | ✓               |
| Number of patients enrolled for HTN who transitioned into a higher BP category      | ✓             | ✓                    | ✓      | ✓       | ✓              | ✓             | ✓             | ✓           | ✓               |
| Number of patients enrolled for diabetes who transitioned into a higher BP category | ✓             | ✓                    | -      | -       | -              | -             | ✓             | ✓           | ✓               |

Figure SA1.1 – Flowchart of HealthRise participants in Brazil.

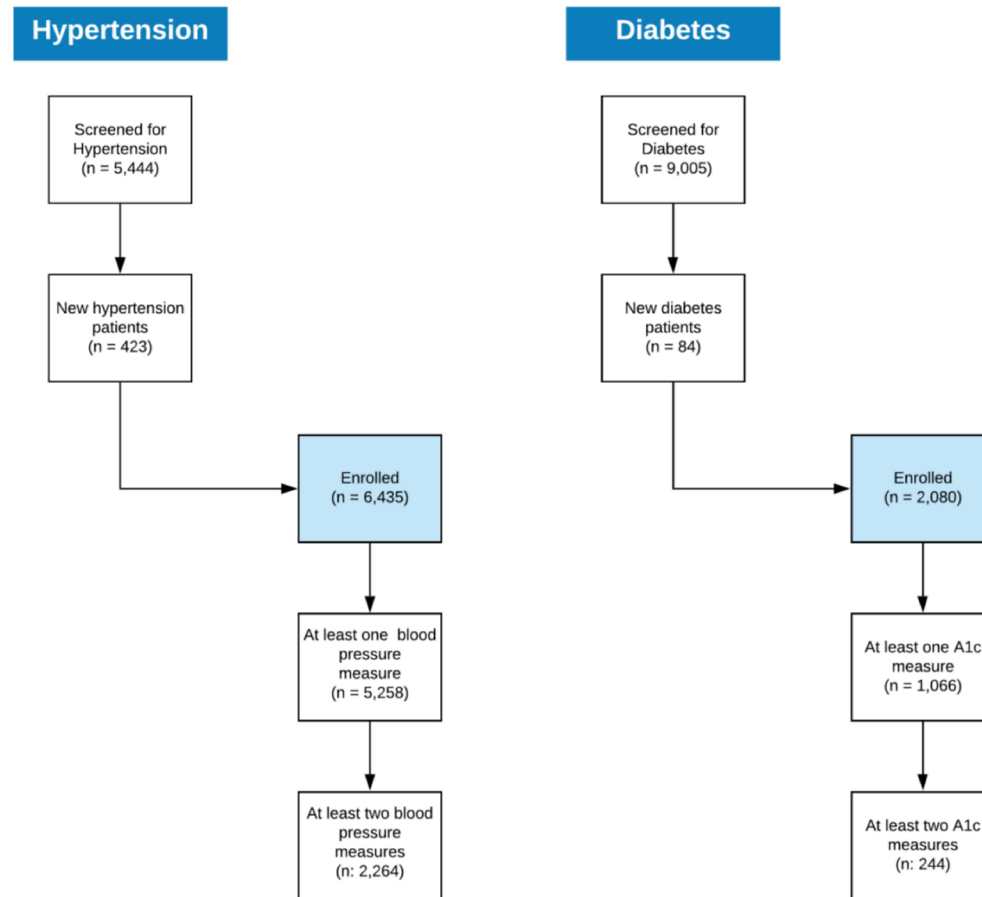

Table SA1.3 – Monitoring indicator results for Teófilo Otoni, Brazil

| Definition                                                                                                                                                                                                                                                                         | Teofilo Otoni |
|------------------------------------------------------------------------------------------------------------------------------------------------------------------------------------------------------------------------------------------------------------------------------------|---------------|
| Number of stakeholders' meetings during the project                                                                                                                                                                                                                                | 300           |
| Number of education materials produced (distance learning courses or other)                                                                                                                                                                                                        | 26            |
| Awareness activities conducted                                                                                                                                                                                                                                                     | 7             |
| Number of public screening events ("health fairs")                                                                                                                                                                                                                                 | 9             |
| Total number of tele-consults performed                                                                                                                                                                                                                                            | 31            |
| Total number of health workers trained                                                                                                                                                                                                                                             | 384           |
| Number of community health workers (CHWs) trained                                                                                                                                                                                                                                  | 243           |
| Number of patients who attended support groups during the project                                                                                                                                                                                                                  | 813           |
| Number of patients who got A1c through Point of Care grant                                                                                                                                                                                                                         | 57            |
| Number of individuals screened either for HTN or DM, according to the definitions below                                                                                                                                                                                            | 9,432         |
| Number of individuals who attended a screening activity and: 1) reported a previous HTN diagnosis; 2) or <u>no</u> previous HTN diagnosis but had a BP reading at the time of the screening activity                                                                               | 9,244         |
| Number of individuals who attended a screening activity and: 1) reported a previous DM diagnosis; 2) or no previous DM diagnosis but had a capillary blood glucose (CBG) measurement at the time of the screening activity or a first Fasting Glucose (FG) at the health facility. | 6,935         |
| Number of individuals without a previous diagnosis that were measured either for HTN or DM                                                                                                                                                                                         | 5,764         |
| Number of individuals who attended a screening activity, did not report a previous HTN diagnosis, and received a BP measurement at the time of the screening activity                                                                                                              | 3,129         |
| Number of individuals who attended a screening activity, did not report a previous DM diagnosis, and received a CBG measurement at the time of the screening activity or FG at the health facility.                                                                                | 5,396         |
| Of those screened, the sum of the number of individuals who reported a previous diagnosis and the number of individuals without a previous diagnosis with readings above the screening threshold, according to the definitions below                                               | 7,445         |
| Of those screened for HTN, the sum of the number of individuals who reported a previous HTN diagnosis and the number of individuals without a previous HTN diagnosis measured with SBP $\geq$ 140mmHg or DBP $\geq$ 90mmHg                                                         | 6,988         |
| Of those screened for DM, the sum of the number of individuals who reported a previous DM diagnosis and the number of individuals without a previous DM diagnosis measured with CBG $\geq$ 200mg/dl and DM symptoms; or 1st FG $\geq$ 126mg/dl                                     | 1,664         |
| Number of individuals without a previous diagnosis that were measured and screened above thresholds for either HTN or DM, according to the definitions below                                                                                                                       | 982           |
| Of those measured for HTN, the number of individuals who didn't report a previous HTN diagnosis and measured SBP $\geq$ 140mmHg or DBP $\geq$ 90mmHg                                                                                                                               | 871           |
| Of those measured for DM, the number of individuals who didn't report a previous DM diagnosis and measured CBG $\geq$ 200mg/dl + DM symptoms; or 1st FG $\geq$ 126mg/dl                                                                                                            | 125           |
| Number of individuals confirmed for either HTN or DM, according to the definitions below                                                                                                                                                                                           | 6,630         |
| Of those screened above thresholds, the sum of the number of patients who reported a previous HTN diagnosis and those newly diagnosed for HTN                                                                                                                                      | 6,305         |

| Definition                                                                                                                                  | Teofilo Otoni (cont.) |
|---------------------------------------------------------------------------------------------------------------------------------------------|-----------------------|
| Of those screened above thresholds, the sum of the number of patients who reported a previous DM diagnosis and those newly diagnosed for DM | 1,579                 |
| Number of individuals newly diagnosed for either HTN or DM                                                                                  | 225                   |
| Number of individuals newly diagnosed for HTN                                                                                               | 190                   |
| Number of individuals newly diagnosed for DM                                                                                                | 40                    |
| Number of individuals newly diagnosed for DM and HTN                                                                                        | 5                     |
| Total number of patients enrolled either for HTN or DM, according to the definitions below                                                  | 4,210                 |
| Number of patients with a final diagnosis of HTN that have attended at least one consultation at the health facility                        | 3,992                 |
| Number of patients with a final diagnosis of DM that have attended at least one consultation at the health facility                         | 1,028                 |
| Number of patients with a final diagnosis of DM and HTN that have attended at least one consultation at the health facility                 | 810                   |
| Total number of patients taking the medication                                                                                              | 2,237                 |
| Number of HTN patients taking prescribed pharmacotherapy                                                                                    | 2,090                 |
| Number of DM patients taking prescribed pharmacotherapy                                                                                     | 400                   |
| Number of enrolled patients with a final HTN or DM diagnosis that have attended $\geq 2$ consultations at the health facility               | 2,027                 |
| Number of enrolled patients with a final HTN diagnosis that have attended $\geq 2$ consultations at the health facility                     | 1,914                 |
| Number of enrolled patients with a final DM diagnosis that have attended $\geq 2$ consultations at the health facility                      | 576                   |
| Average number of consults at the health facility among enrolled patients enrolled                                                          | 2.1                   |
| Number of patients with a final DM diagnosis with at least one A1c reading available                                                        | 631                   |
| Number of patients with a final HTN diagnosis with at least one BP reading available                                                        | 3,196                 |
| Number of patients with a final DM diagnosis with at least two A1c readings available.                                                      | 176                   |
| Number of patients with a final HTN diagnosis with at least two BP readings available                                                       | 1,169                 |
| Total number of patients controlled for DM or HTN, according to the definitions below                                                       | 1,821                 |
| Patients enrolled for HTN with BP < 140/90mmHg at last available reading                                                                    | 1,586                 |
| Patients enrolled for DM with A1c < 8% at last available reading.                                                                           | 358                   |
| Average change in SBP, among those enrolled for HTN with at least 2 readings available (Last SBP - First SBP)                               | -1.9                  |
| Average change in A1c, among those enrolled for DM with at least 2 readings available (Last A1c - First A1c)                                | -0.6                  |
| Patients with SBP decrease $\geq 10\%$ , among those enrolled for HTN with at least 2 readings available (Last SBP - First SBP)             | 273                   |

| Definition                                                                                                                                                        | Teofilo Otoni<br>(cont.) |
|-------------------------------------------------------------------------------------------------------------------------------------------------------------------|--------------------------|
| Patients with A1c decrease $\geq 10\%$ , among those enrolled for DM with at least 2 readings available (Last A1c - First A1c)                                    | 61                       |
| Patients with SBP increase $\geq 10\%$ , among those enrolled for HTN with at least 2 readings available (Last SBP - First SBP)                                   | 225                      |
| Patients with A1c increase $\geq 10\%$ , among those enrolled for DM with at least 2 readings available (Last A1c - First A1c)                                    | 23                       |
| Total number of patients who showed positive progress in their condition, by moving from one BP or blood glucose category to a lower BP or blood glucose category | 352                      |
| Patients whose BP has moved to a lower category, among those enrolled for HTN with at least 2 BP readings                                                         | 314                      |
| Patients whose A1c has moved to a lower category, among those enrolled for DM with at least 2 A1c readings                                                        | 53                       |
| Total number of patients who showed decline in their condition, by moving from one BP or blood glucose category to a higher BP or blood glucose category          | 253                      |
| Patients whose BP has moved to a higher category, among those enrolled for HTN with at least 2 BP readings                                                        | 241                      |
| Patients whose A1c has moved to a higher category, among those enrolled for DM with at least 2 A1c readings                                                       | 18                       |



Table SA1.4 – Monitoring indicator results for Vitória da Conquista, Brazil

| Definition                                                                                                                                                                                                                                                                                                                                     | Vitoria da Conquista |
|------------------------------------------------------------------------------------------------------------------------------------------------------------------------------------------------------------------------------------------------------------------------------------------------------------------------------------------------|----------------------|
| Number of stakeholders' meetings during the project                                                                                                                                                                                                                                                                                            | 37                   |
| Number of education materials produced (distance learning courses or other)                                                                                                                                                                                                                                                                    | 2                    |
| Awareness activities                                                                                                                                                                                                                                                                                                                           | 35                   |
| Number of public screening events ("health fairs")                                                                                                                                                                                                                                                                                             | 23                   |
| Total number of health workers trained (in-person trainings)                                                                                                                                                                                                                                                                                   | 595                  |
| Number of CHWs trained (in-person trainings)                                                                                                                                                                                                                                                                                                   | 340                  |
| Number of patients who attended the health facility gyms during the project                                                                                                                                                                                                                                                                    | 136                  |
| Number of patients who got A1c through Point of Care grant                                                                                                                                                                                                                                                                                     | 376                  |
| Number of individuals screened either for HTN or DM, according to the definitions below.                                                                                                                                                                                                                                                       | 4,323                |
| Number of individuals who attended a screening activity and: 1) reported a previous HTN diagnosis; 2) or <u>no</u> previous HTN diagnosis but had a BP reading at the time of the screening activity                                                                                                                                           | 4,321                |
| Number of individuals who attended a screening activity and: 1) reported a previous DM diagnosis; 2) or <u>no</u> previous DM diagnosis but had a CBG or FG reading at the time of the screening activity.                                                                                                                                     | 4,295                |
| Number of individuals without a previous diagnosis that got measured either for HTN or DM                                                                                                                                                                                                                                                      | 3,753                |
| Number of individuals who attended a screening activity, did not report a previous HTN diagnosis, and received a BP measurement at the time of the screening activity                                                                                                                                                                          | 2,315                |
| Number of individuals who attended a screening activity, did not report a previous DM diagnosis, and received a CBG or FG measurement at the time of the screening activity.                                                                                                                                                                   | 3,609                |
| Of those screened, the sum of the number of individuals who reported a previous diagnosis and the number of individuals without a previous diagnosis with readings above the screening threshold, according to the definitions below                                                                                                           | 2,866                |
| Of those screened for HTN, the sum of the number of individuals who reported a previous HTN diagnosis and the number of individuals without a previous HTN diagnosis and SBP $\geq$ 140 mmHg or DBP $\geq$ 90 mmHg                                                                                                                             | 2,633                |
| Of those screened for DM, the sum of the number of individuals who reported a previous DM diagnosis and the number of individuals without a previous DM diagnosis and:<br><b>For VC Health Unit:</b> CBG $\geq$ 100 mg/dl if fasting; CBG $\geq$ 140 mg/dl if non-fasting.<br><b>For VC SESI:</b> FG $\geq$ 126 mg/dl or CBG $\geq$ 140 mg/dl. | 1,185                |
| Number of individuals without a previous diagnosis that were measured and screened above thresholds for either HTN or DM, according to the definitions below                                                                                                                                                                                   | 1,051                |
| Of those measured for HTN, the number of individuals who didn't report a previous HTN diagnosis and measured SBP $\geq$ 140 mmHg or DBP $\geq$ 90 mmHg                                                                                                                                                                                         | 626                  |

| Definition                                                                                                                                                                                                                                                                                            | Vitoria da Conquista (cont.) |
|-------------------------------------------------------------------------------------------------------------------------------------------------------------------------------------------------------------------------------------------------------------------------------------------------------|------------------------------|
| Of those measured for DM, the number of individuals who didn't report a previous DM diagnosis and:<br><b>For VC Health Unit:</b> measured CBG $\geq$ 100 mg/dl if fasting; measured CBG $\geq$ 140 mg/dl if non-fasting.<br><b>For VC SESI:</b> measured FG $\geq$ 126 mg/dl or CBG $\geq$ 100 mg/dl. | 499                          |
| Number of individuals confirmed for either HTN or DM, according to the definitions below                                                                                                                                                                                                              | 2,234                        |
| Of those screened above thresholds, the sum of the number of patients who reported a previous HTN diagnosis and the number of patients newly diagnosed for HTN                                                                                                                                        | 2,237                        |
| Of those screened above thresholds, the sum of the number of patients who reported a previous DM diagnosis and the number of patients newly diagnosed for DM                                                                                                                                          | 730                          |
| Number of patients newly diagnosed for either HTN or DM                                                                                                                                                                                                                                               | 263                          |
| Number of patients newly diagnosed for HTN                                                                                                                                                                                                                                                            | 233                          |
| Number of patients newly diagnosed for DM                                                                                                                                                                                                                                                             | 44                           |
| Number of patients newly diagnosed for DM and HTN                                                                                                                                                                                                                                                     | 12                           |
| Total number of patients enrolled either for HTN or DM, according to the definitions below                                                                                                                                                                                                            | 2,610                        |
| Number of patients with a final diagnosis of HTN that have attended at least one consultation at the health facility                                                                                                                                                                                  | 2,443                        |
| Number of patients with a final diagnosis of DM that have attended at least one consultation at the health facility                                                                                                                                                                                   | 1,052                        |
| Number of patients with a final diagnosis of DM and HTN that have attended at least one consultation at the health facility                                                                                                                                                                           | 885                          |
| Among patients that were enrolled after being screened, the average number of days between screening and 1st consultation at the health facility                                                                                                                                                      | 88.5                         |
| Total number of patients prescribed pharmacotherapy                                                                                                                                                                                                                                                   | 1,728                        |
| Number of HTN patients prescribed pharmacotherapy                                                                                                                                                                                                                                                     | 1,566                        |
| Number of DM patients prescribed pharmacotherapy                                                                                                                                                                                                                                                      | 622                          |
| Enrolled patients with a final HTN or DM diagnosis that have attended $\geq$ 2 consultations at the health facility                                                                                                                                                                                   | 1,298                        |
| Enrolled patients with a final HTN diagnosis that have attended $\geq$ 2 consultations at the health facility                                                                                                                                                                                         | 1,218                        |
| Enrolled patients with a final DM diagnosis that have attended $\geq$ 2 consultations at the health facility                                                                                                                                                                                          | 541                          |
| Average number of consults at the health facility among enrolled patients                                                                                                                                                                                                                             | 2.87                         |
| Number of patients with a final DM diagnosis with at least one A1c reading available.                                                                                                                                                                                                                 | 435                          |
| Number of patients with a final HTN diagnosis with at least one BP reading available                                                                                                                                                                                                                  | 2,062                        |
| Number of patients with a final DM diagnosis with at least two A1c readings available.                                                                                                                                                                                                                | 68                           |
| Number of patients with a final HTN diagnosis with at least two BP readings available                                                                                                                                                                                                                 | 1,095                        |
| Total numbers of patients controlled for DM or HTN, according to the definitions below                                                                                                                                                                                                                | 995                          |
| Patients enrolled for HTN with BP < 140/90mmHg at last available reading                                                                                                                                                                                                                              | 845                          |
| Patients enrolled for DM with A1c < 8% at last available reading                                                                                                                                                                                                                                      | 228                          |

| Definition                                                                                                                                                        | Vitoria da Conquista (cont.) |
|-------------------------------------------------------------------------------------------------------------------------------------------------------------------|------------------------------|
| Average change in SBP, among those enrolled for HTN with at least 2 readings available (Last SBP - First SBP)                                                     | -4.14                        |
| Average change in A1c, among those enrolled for DM with at least 2 readings available (Last A1c - First A1c)                                                      | -0.94                        |
| Patients with SBP decrease $\geq 10\%$ , among those enrolled for HTN with at least 2 readings available (Last SBP - First SBP)                                   | 206                          |
| Patients with A1c decrease $\geq 10\%$ , among those enrolled for DM with at least 2 readings available (Last A1c - First A1c)                                    | 33                           |
| Patients with SBP increase $\geq 10\%$ , among those enrolled for HTN with at least 2 readings available (Last SBP - First SBP)                                   | 81                           |
| Patients with A1c increase $\geq 10\%$ , among those enrolled for DM with at least 2 readings available (Last A1c - First A1c)                                    | 6                            |
| Total number of patients who showed positive progress in their condition, by moving from one BP or blood glucose category to a lower BP or blood glucose category | 256                          |
| Patients whose BP has moved to a lower category, among those enrolled for HTN with at least 2 BP readings                                                         | 230                          |
| Patients whose A1c has moved to a lower category, among those enrolled for DM with at least 2 A1c readings                                                        | 29                           |
| Total number of patients who showed a decline in their condition, by moving from one BP or blood glucose category to a higher BP or blood glucose category        | 85                           |
| Patients whose BP has moved to a higher category, among those enrolled for HTN with at least 2 BP readings                                                        | 80                           |
| Patients whose A1c has moved to a higher category, among those enrolled for DM with at least 2 A1c readings                                                       | 5                            |

Figure SA1.2 – Flowchart of HealthRise participants in India.

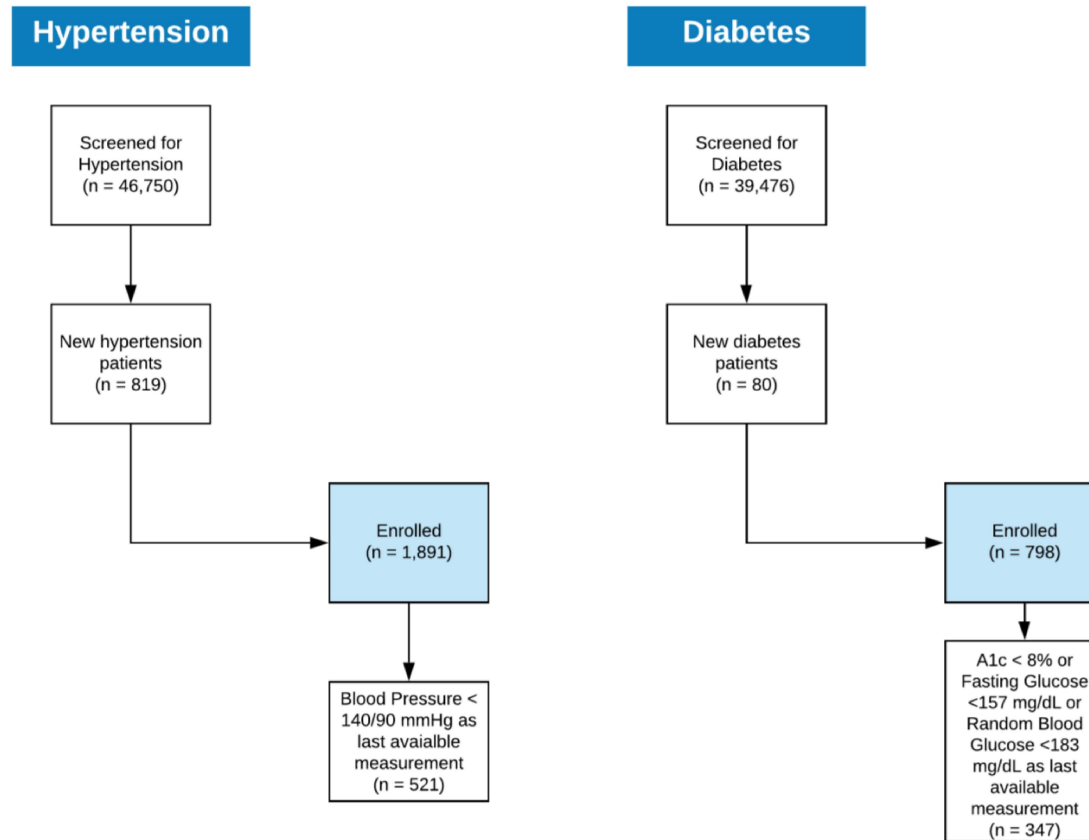

Table SA1.5 – Monitoring indicator results for Shimla, India

| Definition                                                                                                                                                                                                                           | Shimla |
|--------------------------------------------------------------------------------------------------------------------------------------------------------------------------------------------------------------------------------------|--------|
| Awareness activities                                                                                                                                                                                                                 | 87,151 |
| Number of public screening events (“health fairs”)                                                                                                                                                                                   | 336    |
| Number of household visits made by Accredited social health activist (ASHAs), Anganwadi Worker (AWWs), and Outreach Workers (ORWs)                                                                                                   | 16,286 |
| Total number of health workers trained                                                                                                                                                                                               | 787    |
| Number of CHWs (ASHAs) trained                                                                                                                                                                                                       | 473    |
| Number of support groups/Noncommunicable diseases (NCD) meetings held                                                                                                                                                                | 386    |
| Number of individuals screened either for HTN or DM, according to the definitions below.                                                                                                                                             | 22,053 |
| Number of individuals who attended a screening activity and: 1) reported a previous HTN diagnosis; 2) or <u>no</u> previous HTN diagnosis but had a BP reading at the time of the screening activity                                 | 22,053 |
| Number of individuals who attended a screening activity and: 1) reported a previous DM diagnosis; 2) or <u>no</u> previous DM diagnosis but had a Random Blood Glucose (RBG) or FG reading at the time of the screening activity     | 22,053 |
| Number of individuals who attended a screening activity, did not report a previous HTN diagnosis, and received a BP measurement at the time of the screening activity                                                                | 20,606 |
| Number of individuals who attended a screening activity, did not report a previous DM diagnosis, and received an RBG or FG measurement at the time of the screening activity                                                         | 21,482 |
| Of those screened for HTN, the sum of the number of individuals who reported a previous HTN diagnosis and the number of individuals without a previous HTN diagnosis that were screened with SBP $\geq$ 140mmHg or DBP $\geq$ 90mmHg | 3,661  |
| Of those screened for DM, the sum of the number of individuals who reported a previous DM diagnosis and the number of individuals without a previous DM diagnosis that were screened with RBG $\geq$ 140 mg/dl                       | 1,471  |
| Of those screened for HTN, the number of individuals who didn’t report a previous HTN diagnosis and were screened with SBP $\geq$ 140mmHg or DBP $\geq$ 90mmHg                                                                       | 2,214  |
| Of those screened for DM, the number of individuals who didn’t report a previous DM diagnosis and were screened with RBG $\geq$ 140mg/dl                                                                                             | 900    |
| Of those screened above BP thresholds, the sum of the number of patients who reported a previous HTN diagnosis and the number of individuals without a previous diagnosis for HTN who received a confirmatory HTN diagnosis          | 2,002  |
| Of those screened above blood glucose thresholds, the sum of the number of patients who reported a previous DM diagnosis and the number of individuals without a previous diagnosis for DM who received a confirmatory DM diagnosis  | 627    |
| Number of patients without a previous diagnosis for HTN who received a confirmatory HTN diagnosis                                                                                                                                    | 555    |
| Number of patients without a previous diagnosis for DM who received a confirmatory DM diagnosis                                                                                                                                      | 56     |
| Number of patients who received a confirmatory diagnosis for DM and HTN and who did not report a previous diagnosis for either HTN or DM (or both HTN and DM)                                                                        | 9      |
| Average time (days) between screening above BP thresholds and initial clinic visit among patients who were referred to, and visited, a health facility for HTN                                                                       | 39.66  |
| Average time (days) between screening above blood glucose thresholds and initial clinic visit among patients who were referred to, and visited a health facility for DM                                                              | 38.63  |

| Definition                                                                                                                                        | Shimla (cont.) |
|---------------------------------------------------------------------------------------------------------------------------------------------------|----------------|
| Number of individuals with a referral for HTN that have accessed a clinic for confirmatory testing/consultation                                   | 1,373          |
| Number of individuals with a referral for HTN that have accessed a clinic for confirmatory testing/consultation within 45 days of referral        | 965            |
| Number of individuals with a referral for DM that have accessed a clinic for confirmatory testing/consultation                                    | 473            |
| Number of individuals with a referral for DM that have accessed a clinic for confirmatory testing/consultation within 45 days of referral         | 333            |
| Number of individuals with a referral for HTN and DM that have accessed a clinic for confirmatory testing/consultation                            | 164            |
| Number of individuals with a referral for HTN and DM that have accessed a clinic for confirmatory testing/consultation within 45 days of referral | 115            |
| HTN patients with no previous diagnosis that were prescribed pharmacotherapy                                                                      | 205            |
| DM patients with no previous diagnosis that were prescribed pharmacotherapy                                                                       | 70             |
| Average number of follow-up visits per year for HTN patients (excludes initial visit)                                                             | 3.1            |
| Average number of follow-up visits per year for DM patients (excludes initial visit)                                                              | 3.2            |
| Patients enrolled for HTN with BP < 140/90mmHg at last available measurement                                                                      | 330            |
| Patients enrolled for DM with A1c < 8%/FG<157/RBG<183 as last available measurement                                                               | 253            |
| Average change in SBP, among those enrolled for HTN with at least 2 readings available (Last SBP - First SBP)                                     | 15             |
| Patients with SBP decreases $\geq 10\%$ , among those enrolled for HTN with at least 2 readings available (Last SBP - First SBP)                  | 521            |
| Patients with SBP increases $\geq 10\%$ , among those enrolled for HTN with at least 2 readings available (Last SBP - First SBP)                  | 46             |
| Patients whose BP has moved to a lower category, among those enrolled for HTN with at least 2 BP readings                                         | 442            |
| Patients whose BP has moved to a higher category, among those enrolled for HTN with at least 2 BP readings                                        | 66             |

Table SA1.6 – Monitoring indicator results for Udaipur, India

| Definition                                                                                                                                                                                                                           | Udaipur |
|--------------------------------------------------------------------------------------------------------------------------------------------------------------------------------------------------------------------------------------|---------|
| Awareness activities                                                                                                                                                                                                                 | 59,869  |
| Number of public screening events (“health fairs”)                                                                                                                                                                                   | 128     |
| Total number of health workers trained                                                                                                                                                                                               | 1,060   |
| Number of CHWs (ASHAs) trained                                                                                                                                                                                                       | 543     |
| Number of support groups/NCD meetings held                                                                                                                                                                                           | 258     |
| Number of patients who attended support groups during the project                                                                                                                                                                    | 3,487   |
| Number of individuals screened either for HTN or DM, according to the definitions below.                                                                                                                                             | 26,559  |
| Number of individuals who attended a screening activity and: 1) reported a previous HTN diagnosis; 2) or <u>no</u> previous HTN diagnosis but had a BP reading at the time of the screening activity                                 | 26,559  |
| Number of individuals who attended a screening activity and: 1) reported a previous DM diagnosis; 2) or <u>no</u> previous DM diagnosis but had a RBG or FG reading at the time of the screening activity                            | 18,166  |
| Number of individuals who attended a screening activity, did not report a previous HTN diagnosis, and received a BP measurement at the time of the screening activity                                                                | 26,144  |
| Number of individuals who attended a screening activity, did not report a previous DM diagnosis, and received an RBG or FG measurement at the time of the screening activity                                                         | 17,994  |
| Of those screened for HTN, the sum of the number of individuals who reported a previous HTN diagnosis and the number of individuals without a previous HTN diagnosis that were screened with SBP $\geq$ 140mmHg or DBP $\geq$ 90mmHg | 1,250   |
| Of those screened for DM, the sum of the number of individuals who reported a previous DM diagnosis and the number of individuals without a previous DM diagnosis that were screened with RBG $\geq$ 140 mg/dl                       | 1,011   |
| Of those screened for HTN, the number of individuals who didn’t report a previous HTN diagnosis and were screened with SBP $\geq$ 140mmHg or DBP $\geq$ 90mmHg                                                                       | 835     |
| Of those screened for DM, the number of individuals who didn’t report a previous DM diagnosis and were screened with RBG $\geq$ 140mg/dl                                                                                             | 839     |
| Of those screened above BP thresholds, the sum of the number of patients who reported a previous HTN diagnosis and the number of individuals without a previous diagnosis for HTN who received a confirmatory HTN diagnosis          | 679     |
| Of those screened above blood glucose thresholds, the sum of the number of patients who reported a previous DM diagnosis and the number of individuals without a previous diagnosis for DM who received a confirmatory DM diagnosis  | 279     |
| Number of patients without a previous diagnosis for HTN who received a confirmatory HTN diagnosis                                                                                                                                    | 264     |
| Number of patients without a previous diagnosis for DM who received a confirmatory DM diagnosis                                                                                                                                      | 107     |
| Number of patients who received a confirmatory diagnosis for DM and HTN and who did not report a previous diagnosis for either HTN or DM (or both HTN and DM)                                                                        | 26      |
| Average time (days) between screening above BP thresholds and initial clinic visit among patients who were referred to, and visited, a health facility for HTN                                                                       | 4.14    |
| Average time (days) between screening above blood glucose thresholds and initial clinic visit among patients who were referred to, and visited a health facility for DM                                                              | 2.76    |

| Definition                                                                                                                                        | Udaipur (cont.) |
|---------------------------------------------------------------------------------------------------------------------------------------------------|-----------------|
| Number of individuals with a referral for HTN that have accessed a clinic for confirmatory testing/consultation                                   | 581             |
| Number of individuals with a referral for HTN that have accessed a clinic for confirmatory testing/consultation within 28 days of referral        | 580             |
| Number of individuals with a referral for DM that have accessed a clinic for confirmatory testing/consultation                                    | 325             |
| Number of individuals with a referral for DM that have accessed a clinic for confirmatory testing/consultation within 28 days of referral         | 325             |
| Number of individuals with a referral for HTN and DM that have accessed a clinic for confirmatory testing/consultation                            | 203             |
| Number of individuals with a referral for HTN and DM that have accessed a clinic for confirmatory testing/consultation within 28 days of referral | 203             |
| HTN patients with no previous diagnosis that were prescribed pharmacotherapy                                                                      | 297             |
| DM patients with no previous diagnosis that were prescribed pharmacotherapy                                                                       | 76              |
| Average number of follow-up visits per year for HTN patients (excludes initial visit)                                                             | 2.9             |
| Average number of follow-up visits per year for DM patients (excludes initial visit)                                                              | 2.9             |
| Patients enrolled for HTN with BP < 140/90mmHg at last available measurement                                                                      | 191             |
| Patients enrolled for DM with A1c < 8%/FG<157/RBG<183 as last available measurement                                                               | 94              |
| Average change in SBP, among those enrolled for HTN with at least 2 readings available (Last SBP - First SBP)                                     | 1.6             |
| Patients with SBP decreases $\geq 10\%$ , among those enrolled for HTN with at least 2 readings available (Last SBP - First SBP)                  | 185             |
| Patients with SBP increases $\geq 10\%$ , among those enrolled for HTN with at least 2 readings available (Last SBP - First SBP)                  | 86              |
| Patients whose BP has moved to a lower category, among those enrolled for HTN with at least 2 BP readings                                         | 175             |
| Patients whose BP has moved to a higher category, among those enrolled for HTN with at least 2 BP readings                                        | 110             |



Figure SA1.3 – Flowchart of HealthRise participants in South Africa.

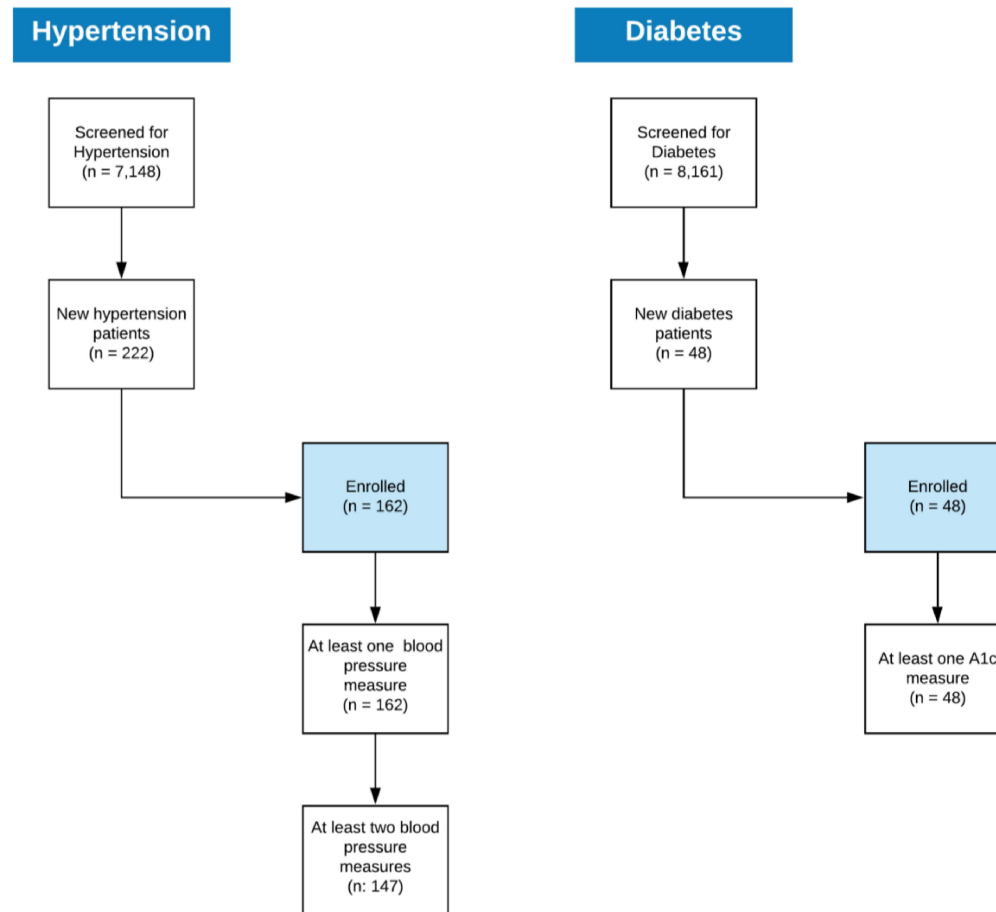

Table SA1.7 – Monitoring indicator results for Pixley ka Seme, South Africa

| Definition                                                                                                                                                                                             | Pixley ka Seme |
|--------------------------------------------------------------------------------------------------------------------------------------------------------------------------------------------------------|----------------|
| Number of risk assessments                                                                                                                                                                             | 3,816          |
| Number of public screening events (“health fairs”) [includes workplace, household, and support group events]                                                                                           | 1,389          |
| Total number of health workers trained: PSI + CHWs + facility staff                                                                                                                                    | 461            |
| Number of CHWs trained                                                                                                                                                                                 | 327            |
| Number of support groups and/or NCD club meetings held                                                                                                                                                 | 2              |
| Number of support groups started during the project [includes 5-step groups, garden groups, and village savings & loan groups]                                                                         | 94             |
| Number of patients who attended a screening activity and: 1) reported a previous HTN diagnosis; 2) or <u>no</u> previous HTN diagnosis but had a BP reading at the time of the screening activity      | 3,789          |
| Number of individuals who attended a screening activity and: 1) reported a previous DM diagnosis; 2) or no previous DM diagnosis but had a BG reading at the time of the screening activity            | 3,872          |
| Number of individuals screened for HTN who reported no previous HTN diagnosis                                                                                                                          | 2,366          |
| Number of individuals screened for DM who reported no previous DM diagnosis                                                                                                                            | 3,570          |
| Of those screened for HTN, the number of individuals with SBP $\geq$ 140mmHg or DBP $\geq$ 90mmHg (regardless of previous diagnosis)                                                                   | 1,413          |
| Of those screened for DM, the number of individuals with non-fasting RBG $\geq$ 11.1 mmol/L (regardless of previous diagnosis)                                                                         | 224            |
| Of those screened for HTN, number of individuals who didn’t report a previous HTN diagnosis and measured SBP $\geq$ 140mmHg or DBP $\geq$ 90mmHg                                                       | 677            |
| Of those screened for DM, number of individuals who didn’t report a previous DM diagnosis and measured non-fasting RBG $\geq$ 11.1 mmol/L                                                              | 71             |
| Number of individuals diagnosed and confirmed for HTN (regardless of previous diagnosis)                                                                                                               | 142            |
| Number of individuals diagnosed and confirmed for DM (regardless of previous diagnosis)                                                                                                                | 33             |
| Number of individuals diagnosed with HTN who reported no previous HTN diagnosis                                                                                                                        | 93             |
| Number of individuals diagnosed with DM who reported no previous DM diagnosis                                                                                                                          | 24             |
| Number of patients who were referred to a clinic after screening and initiated treatment for hypertension (includes newly diagnosed individuals and individuals who reported a previous HTN diagnosis) | 106            |
| Number of patients who were referred to a clinic after screening and initiated treatment for diabetes (includes newly diagnosed individuals and individuals who reported a previous diagnosis)         | 27             |
| Of those with a confirmed HTN diagnosis (new and existing), the number of individuals who received a monitoring visit with a BP measurement                                                            | 98             |
| Of those with a confirmed DM diagnosis (new and existing), those who received a monitoring visit with a blood glucose measurement                                                                      | 31             |
| Number of patients enrolled for hypertension with 2 or more SBP measurements                                                                                                                           | 88             |

| Definition                                                                                                                                                                                                              | Pixley ka Seme<br>(cont.) |
|-------------------------------------------------------------------------------------------------------------------------------------------------------------------------------------------------------------------------|---------------------------|
| Of those with a confirmed HTN diagnosis, the number of patients with SBP < 140mmHg / DBP < 90mmHg at the time of the most recently available measurement. (Only includes individuals with 1 or more monitoring visits.) | 53                        |
| Of those with a confirmed DM diagnosis, the number of patients with RBS reading $\leq$ 7.8 mmol/L at the time of the most recently available measurement. (Only includes individuals with 1 or more monitoring visits.) | 9                         |
| Average change in SBP, among those enrolled for HTN with at least 2 readings available (Last SBP - First SBP)                                                                                                           | -21.47                    |
| Patients with SBP decreases $\geq$ 10%, among those enrolled for HTN with at least 2 readings available (Last SBP - First SBP)                                                                                          | 49                        |
| Patients with SBP increases $\geq$ 10%, among those enrolled for HTN with at least 2 readings available (Last SBP - First SBP)                                                                                          | 4                         |
| Patients whose BP has moved to a lower category, among those enrolled for HTN with at least 2 BP readings                                                                                                               | 74                        |
| Patients whose BP has moved to a higher category, among those enrolled for HTN with at least 2 BP readings                                                                                                              | 5                         |

Table SA1.8 – Monitoring indicator results for uMgungundlovu, South Africa

| Definition                                                                                                                                                                                             | uMgungundlovu |
|--------------------------------------------------------------------------------------------------------------------------------------------------------------------------------------------------------|---------------|
| Number of risk assessments                                                                                                                                                                             | 4711          |
| Number of public screening events (“health fairs”) [includes workplace, household, and support group events]                                                                                           | 7324          |
| Total number of health workers trained: PSI + facility staff + CCGs                                                                                                                                    | 317           |
| Number of CCGs trained                                                                                                                                                                                 | 269           |
| Number of support groups and/or NCD club meetings held                                                                                                                                                 | 64            |
| Number of DOH workers trained (includes in-facility staff who are employed by DOH)                                                                                                                     | 267           |
| Number of support groups started during the project                                                                                                                                                    | 7             |
| Number of War Room meetings held                                                                                                                                                                       | 26            |
| Number of individuals who attended a screening activity and: 1) reported a previous HTN diagnosis; 2) or <u>no</u> previous HTN diagnosis but had a BP reading at the time of the screening activity   | 8456          |
| Number of individuals who attended a screening activity and: 1) reported a previous DM diagnosis; 2) or no previous DM diagnosis but had a BG reading at the time of the screening activity            | 6248          |
| Number of individuals screened for HTN who reported no previous HTN diagnosis                                                                                                                          | 4782          |
| Number of individuals screened for DM who reported no previous DM diagnosis                                                                                                                            | 4591          |
| Of those screened for HTN, the number of individuals with SBP $\geq$ 140mmHg or DBP $\geq$ 90mmHg (regardless of previous diagnosis)                                                                   | 2939          |
| Of those screened for DM, the number of individuals with non-fasting RBS $\geq$ 11.1 mmol/L (regardless of previous diagnosis)                                                                         | 489           |
| Of those screened for HTN, number of individuals who didn’t report a previous HTN diagnosis and measured SBP $\geq$ 140mmHg or DBP $\geq$ 90mmHG                                                       | 1216          |
| Of those screened for DM, number of individuals who didn’t report a previous DM diagnosis and measured non-fasting RBG $\geq$ 11.1 mmol/L                                                              | 129           |
| Number of diagnosed and confirmed for HTN (regardless of previous diagnosis)                                                                                                                           | 545           |
| Number of diagnosed and confirmed for DM (regardless of previous diagnosis)                                                                                                                            | 136           |
| Number of individuals diagnosed with HTN who reported no previous HTN diagnosis                                                                                                                        | 129           |
| Number of individuals diagnosed with DM who reported no previous DM diagnosis                                                                                                                          | 24            |
| Number of patients who were referred to a clinic after screening and initiated treatment for hypertension (includes newly diagnosed individuals and individuals who reported a previous HTN diagnosis) | 321           |
| Number of patients who were referred to a clinic after screening and initiated treatment for diabetes (includes newly diagnosed individuals and individuals who reported a previous diagnosis)         | 72            |
| Of those with a confirmed HTN diagnosis (new and existing), the number of individuals who received a monitoring visit with a BP measurement                                                            | 64            |
| Of those with a confirmed DM diagnosis (new and existing), those who received a monitoring visit with a blood glucose measurement                                                                      | 17            |
| Number of patients enrolled for hypertension with 2 or more SBP measurements                                                                                                                           | 59            |

| Definition                                                                                                                                                                                                              | uMgungundlovu (cont.) |
|-------------------------------------------------------------------------------------------------------------------------------------------------------------------------------------------------------------------------|-----------------------|
| Of those with a confirmed HTN diagnosis, the number of patients with SBP < 140mmHg / DBP < 90mmHg at the time of the most recently available measurement. (Only includes individuals with 1 or more monitoring visits.) | 24                    |
| Of those with a confirmed DM diagnosis, the number of patients with RBG reading <= 7.8 mmol/L at the time of the most recently available measurement. (Only includes individuals with 1 or more monitoring visits.)     | 1                     |
| Average change in SBP, among those enrolled for HTN with at least 2 readings available (Last SBP - First SBP)                                                                                                           | -5.24                 |
| Patients with SBP decreases >=10%, among those enrolled for HTN with at least 2 readings available (Last SBP - First SBP)                                                                                               | 19                    |
| Patients with SBP increases >=10%, among those enrolled for HTN with at least 2 readings available (Last SBP - First SBP)                                                                                               | 6                     |
| Patients whose BP has moved to a lower category, among those enrolled for HTN with at least 2 BP readings                                                                                                               | 19                    |
| Patients whose BP has moved to a higher category, among those enrolled for HTN with at least 2 BP readings                                                                                                              | 8                     |

Figure SA1.4 – Flowchart of HealthRise participants in the United States.

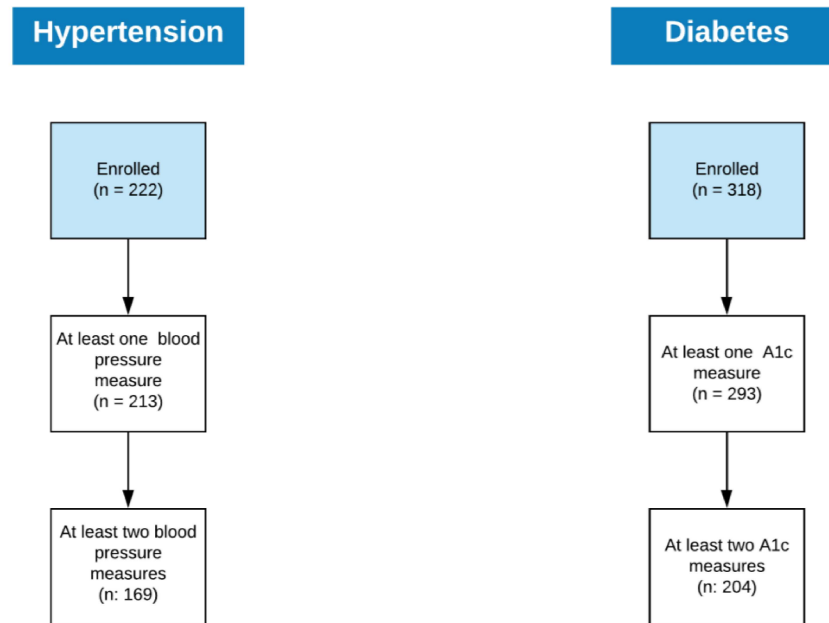

Table SA1.9 – Monitoring indicator results for Ramsey County, USA

| Definition                                                                                                                                | Ramsey County |
|-------------------------------------------------------------------------------------------------------------------------------------------|---------------|
| Total number of health workers trained                                                                                                    | 13            |
| Number of CHWs trained                                                                                                                    | 5             |
| Total number of patients enrolled either for HTN or DM, according to the definitions below                                                | 78            |
| Number of patients with a final diagnosis of HTN that have attended at least one consultation at the health facility                      | 33            |
| Number of patients with a final diagnosis of DM that have attended at least one consultation at the health facility                       | 69            |
| Number of patients with a final HTN diagnosis with at least one BP reading available                                                      | 32            |
| Number of patients with a final DM diagnosis with at least one A1c reading available                                                      | 69            |
| Number of patients with a final HTN diagnosis with at least two BP readings available                                                     | 21            |
| Number of patients with a final DM diagnosis with at least two A1c readings available                                                     | 42            |
| Total numbers of patients controlled for DM or HTN, according to the definitions below                                                    | 16            |
| Number of patients enrolled for HTN with BP < 140/90mmHg at last available reading                                                        | 10            |
| Number of patients enrolled for DM with A1c < 8% at last available reading                                                                | 12            |
| Average change in SBP, among those enrolled for HTN with at least 2 readings available (Last SBP - First SBP)                             | -5.67         |
| Average change in A1c, among those enrolled for DM with at least 2 readings available (Last A1c - First A1c)                              | -1.56         |
| Number of patients with SBP decrease $\geq 10\%$ , among those enrolled for HTN with at least 2 readings available (Last SBP - First SBP) | 13            |
| Number of patients with A1c decrease $\geq 10\%$ , among those enrolled for DM with at least 2 readings available (Last A1c - First A1c)  | 23            |
| Number of patients with SBP increase $\geq 10\%$ , among those enrolled for HTN with at least 2 readings available (Last SBP - First SBP) | 8             |
| Number of patients with A1c increase $\geq 10\%$ , among those enrolled for DM with at least 2 readings available (Last A1c - First A1c)  | 3             |
| Average change in SBP, among those enrolled for HTN with at least 2 readings available and showing a reduction in blood pressure          | -21.54        |
| Average change in A1C, among those enrolled for DM with at least 2 readings available and showing a reduction in blood glucose            | -2.22         |
| Number of patients whose BP has moved to a lower category, among those enrolled for HTN with at least 2 BP readings                       | 10            |
| Number of patients whose A1c has moved to a lower category, among those enrolled for DM with at least 2 A1c readings                      | 13            |
| Number of patients whose BP has moved to a higher category, among those enrolled for HTN with at least 2 BP readings                      | 4             |
| Number of patients whose A1c has moved to a higher category, among those enrolled for DM with at least 2 A1c readings                     | 11            |

Table SA1.10 – Monitoring indicator results for Rice County, USA

| Definition                                                                                                                                | Rice County |
|-------------------------------------------------------------------------------------------------------------------------------------------|-------------|
| Total number of health workers trained                                                                                                    | 9           |
| Number of CHWs trained                                                                                                                    | 2           |
| Total number of patients enrolled either for HTN or DM, according to the definitions below                                                | 208         |
| Number of patients with a final diagnosis of HTN that have attended at least one consultation at the health facility                      | 87          |
| Number of patients with a final diagnosis of DM that have attended at least one consultation at the health facility                       | 149         |
| Number of patients with a final HTN diagnosis with at least one BP reading available                                                      | 79          |
| Number of patients with a final DM diagnosis with at least one A1c reading available                                                      | 124         |
| Number of patients with a final HTN diagnosis with at least two BP readings available                                                     | 76          |
| Number of patients with a final DM diagnosis with at least two A1c readings available                                                     | 108         |
| Total number of patients controlled for DM or HTN, according to the definitions below                                                     | 74          |
| Number of patients enrolled for HTN with BP < 140/90mmHg at last available reading                                                        | 45          |
| Number of patients enrolled for DM with A1c < 8% at last available reading                                                                | 53          |
| Average change in SBP, among those enrolled for HTN with at least 2 readings available (Last SBP - First SBP)                             | -2.51       |
| Average change in A1c, among those enrolled for DM with at least 2 readings available (Last A1c - First A1c)                              | -0.47       |
| Number of patients with SBP decrease $\geq 10\%$ , among those enrolled for HTN with at least 2 readings available (Last SBP - First SBP) | 18          |
| Number of patients with A1c decrease $\geq 10\%$ , among those enrolled for DM with at least 2 readings available (Last A1c - First A1c)  | 34          |
| Number of patients with SBP increase $\geq 10\%$ , among those enrolled for HTN with at least 2 readings available (Last SBP - First SBP) | 9           |
| Number of patients with A1c increase $\geq 10\%$ , among those enrolled for DM with at least 2 readings available (Last A1c - First A1c)  | 21          |
| Average change in SBP, among those enrolled for HTN with at least 2 readings available and moved to a lower BP category                   | -9.75       |
| Average change in A1C, among those enrolled for DM with at least 2 readings available and moved to a lower A1C category                   | -1.78       |
| Number of patients whose BP has moved to a lower category, among those enrolled for HTN with at least 2 BP readings                       | 23          |
| Number of patients whose A1c has moved to a lower category, among those enrolled for DM with at least 2 A1c readings                      | 31          |
| Number of patients whose BP has moved to a higher category, among those enrolled for HTN with at least 2 BP readings                      | 18          |
| Number of patients whose A1c has moved to a higher category, among those enrolled for DM with at least 2 A1c readings                     | 17          |



Table SA1.11 – Monitoring indicator results for Hennepin County, USA

| Definition                                                                                                                                | Hennepin County |
|-------------------------------------------------------------------------------------------------------------------------------------------|-----------------|
| Total number of health workers trained                                                                                                    | 11              |
| Number of CHWs trained                                                                                                                    | 6               |
| Total number of patients enrolled either for HTN or DM, according to the definitions below                                                | 121             |
| Number of patients with a final diagnosis of HTN that have attended at least one consultation at the health facility                      | 102             |
| Number of patients with a final diagnosis of DM that have attended at least one consultation at the health facility                       | 100             |
| Number of patients with a final HTN diagnosis with at least one BP reading available                                                      | 102             |
| Number of patients with a final DM diagnosis with at least one A1c reading available                                                      | 100             |
| Number of patients with a final HTN diagnosis with at least two BP readings available                                                     | 72              |
| Number of patients with a final DM diagnosis with at least two A1c readings available                                                     | 54              |
| Total number of patients controlled for DM or HTN, according to the definitions below                                                     | 68              |
| Number of patients enrolled for HTN with BP < 140/90mmHg at last available reading                                                        | 55              |
| Number of patients enrolled for DM with A1c < 8% at last available reading                                                                | 26              |
| Average change in SBP, among those enrolled for HTN with at least 2 readings available (Last SBP - First SBP)                             | -3.38           |
| Average change in A1c, among those enrolled for DM with at least 2 readings available (Last A1c - First A1c)                              | -0.92           |
| Number of patients with SBP decrease $\geq 10\%$ , among those enrolled for HTN with at least 2 readings available (Last SBP - First SBP) | 22              |
| Number of patients with A1c decrease $\geq 10\%$ , among those enrolled for DM with at least 2 readings available (Last A1c - First A1c)  | 22              |
| Number of patients with SBP increase $\geq 10\%$ , among those enrolled for HTN with at least 2 readings available (Last SBP - First SBP) | 13              |
| Number of patients with A1c increase $\geq 10\%$ , among those enrolled for DM with at least 2 readings available (Last A1c - First A1c)  | 6               |
| Average change in SBP, among those enrolled for HTN with at least 2 readings available and showing a reduction in blood pressure          | -13.44          |
| Average change in A1C, among those enrolled for DM with at least 2 readings available and showing a reduction in blood glucose            | -1.87           |
| Number of patients whose BP has moved to a lower category, among those enrolled for HTN with at least 2 BP readings                       | 21              |
| Number of patients whose A1c has moved to a lower category, among those enrolled for DM with at least 2 A1c readings                      | 22              |
| Number of patients whose BP has moved to a higher category, among those enrolled for HTN with at least 2 BP readings                      | 5               |
| Number of patients whose A1c has moved to a higher category, among those enrolled for DM with at least 2 A1c readings                     | 6               |
