# Supplementary material for: Community-based interventions for detection and management of diabetes and hypertension in underserved communities: a mixed-methods evaluation in Brazil, India, South Africa and the USA
Source: PubMed Central journal article supplement — BMJ Glob Health. 2020 Jun 4;5(6):e001959. doi: 10.1136/bmjgh-2019-001959 (PMC7279660; doi:10.1136/bmjgh-2019-001959), 2020-06-04
Supplement: bmjgh-2019-001959supp007.pdf [file bmjgh-2019-001959supp007.pdf]

## Supplementary File 7 – Brazil endline results

## A) Hypertension

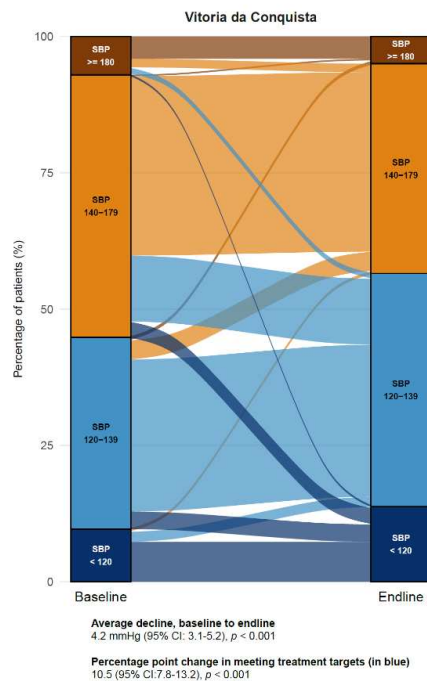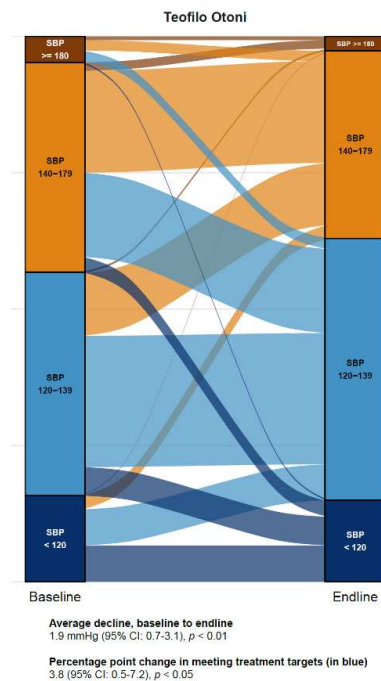

## B) Diabetes

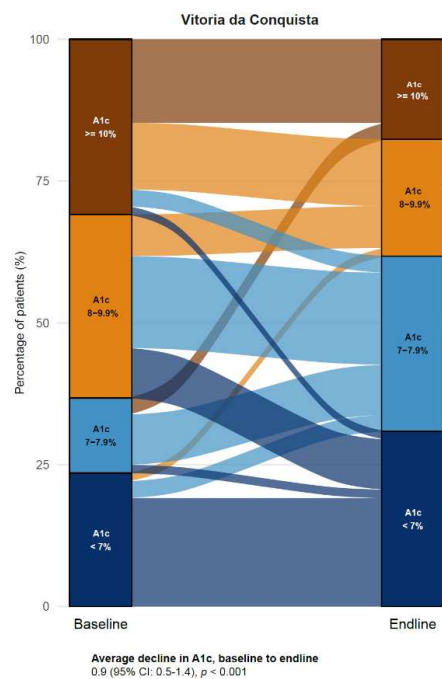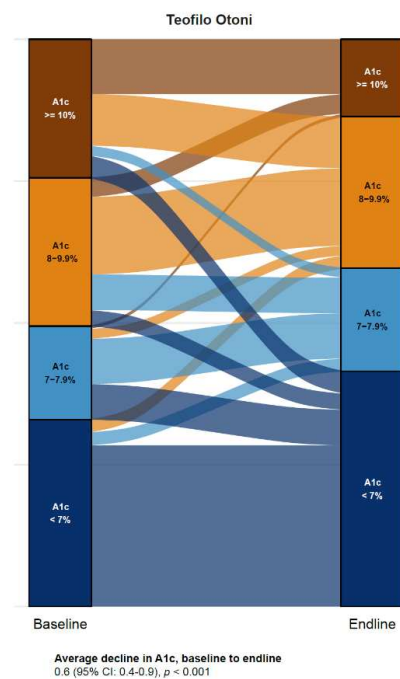

**Patient shifts in categories between baseline and endline based on biometric readings for hypertension (A) and diabetes (B).** The height of each column reflects 100% of patients at each time point (baseline and endline), while the categories within each column represent the percentage of patients in each category at baseline and endline. Patient groups are color-coded by their categorization at endline (right column per site) and flow from their categorization at baseline (left column per site).
