# Supplementary material for: Community-based interventions for detection and management of diabetes and hypertension in underserved communities: a mixed-methods evaluation in Brazil, India, South Africa and the USA
Source: PubMed Central journal article supplement — BMJ Glob Health. 2020 Jun 4;5(6):e001959. doi: 10.1136/bmjgh-2019-001959 (PMC7279660; doi:10.1136/bmjgh-2019-001959), 2020-06-04
Supplement: bmjgh-2019-001959supp008.pdf [file bmjgh-2019-001959supp008.pdf]

## Supplementary File 8 – US Difference-in-difference analysis results

**Table S3A. Unadjusted and adjusted difference-in-difference regression results, by HealthRise grantee, for hypertension patients.**

|                                                                | Hennepin                  |              | Ramsey                       |              | Rice                        |                   |
|----------------------------------------------------------------|---------------------------|--------------|------------------------------|--------------|-----------------------------|-------------------|
|                                                                | Coefficient (95% CI)      | p-value      | Coefficient (95% CI)         | p-value      | Coefficient (95% CI)        | p-value           |
| <b>Hypertension</b>                                            |                           |              |                              |              |                             |                   |
| <b>Change in systolic blood pressure (mmHg)</b>                |                           |              |                              |              |                             |                   |
| <b>Unadjusted model</b>                                        |                           |              |                              |              |                             |                   |
| HealthRise-endline interaction                                 | -4.8 (-11.0 to 1.4)       | 0.130        | <b>-14.4 (-26.4 to -2.3)</b> | <b>0.021</b> | <b>-8.4 (-15.2 to -1.6)</b> | <b>0.016</b>      |
| <b>Adjusted model</b>                                          |                           |              |                              |              |                             |                   |
| HealthRise-endline interaction                                 | -4.8 (-11.1 to 1.5)       | 0.133        | <b>-14.4 (-26.6 to -2.1)</b> | <b>0.022</b> | <b>-8.4 (-15.3 to -1.5)</b> | <b>0.017</b>      |
| Age                                                            |                           |              |                              |              |                             |                   |
| < 50 years                                                     | -                         | -            | -                            | -            | -                           | -                 |
| ≥ 50 years                                                     | 0.7 (-4.6 to 6.0)         | 0.795        | 2.2 (-5.4 to 9.8)            | 0.570        | 0.4 (-4.6 to 5.3)           | 0.879             |
| Sex                                                            |                           |              |                              |              |                             |                   |
| Male                                                           | -                         | -            | -                            | -            | -                           | -                 |
| Female                                                         | 0.3 (-4.1 to 4.8)         | 0.883        | 1.5 (-6.5 to 9.4)            | 0.716        | -0.1 (-4.2 to 3.9)          | 0.946             |
| Duration from baseline to endline                              |                           |              |                              |              |                             |                   |
| < 12 months                                                    | -                         | -            | -                            | -            | -                           | -                 |
| ≥ 12 months                                                    | -0.7 (-7.8 to 6.5)        | 0.858        | -3.8 (-14.6 to 7.1)          | 0.491        | <b>-8.2 (-13.7 to -2.6)</b> | <b>0.004</b>      |
| Comorbid                                                       |                           |              |                              |              |                             |                   |
| No (hypertension only)                                         | -                         | -            | -                            | -            | -                           | -                 |
| Yes (hypertension and diabetes)                                | -4.8 (-11.1 to 1.5)       | 0.133        | -5.2 (-13.9 to 3.4)          | 0.232        | 2.3 (-5.1 to 9.7)           | 0.546             |
| <b>Change in patients meeting treatment targets (% points)</b> |                           |              |                              |              |                             |                   |
| <b>Unadjusted model</b>                                        |                           |              |                              |              |                             |                   |
| HealthRise-endline interaction                                 | <b>24.3 (6.8 to 41.8)</b> | <b>0.007</b> | 20.0 (-5.0 to 44.9)          | 0.116        | 15.1 (-1.0 to 31.1)         | 0.065             |
| <b>Adjusted model</b>                                          |                           |              |                              |              |                             |                   |
| HealthRise-endline interaction                                 | <b>24.3 (6.7 to 41.9)</b> | <b>0.007</b> | 20.0 (-5.4 to 45.3)          | 0.121        | 15.1 (-1.0 to 31.2)         | 0.066             |
| Age                                                            |                           |              |                              |              |                             |                   |
| < 50 years                                                     | -                         | -            | -                            | -            | -                           | -                 |
| ≥ 50 years                                                     | 0.9 (-14.9 to 16.8)       | 0.908        | -1.3 (-20.8 to 18.2)         | 0.895        | 8.3 (-2.1 to 18.6)          | 0.117             |
| Sex                                                            |                           |              |                              |              |                             |                   |
| Male                                                           | -                         | -            | -                            | -            | -                           | -                 |
| Female                                                         | -1.2 (-11.2 to 8.9)       | 0.818        | -9.5 (-27.4 to 8.4)          | 0.295        | -0.5 (-9.1 to 8.1)          | 0.907             |
| Duration from baseline to endline                              |                           |              |                              |              |                             |                   |
| < 12 months                                                    | -                         | -            | -                            | -            | -                           | -                 |
| ≥ 12 months                                                    | 3.6 (-14.2 to 21.5)       | 0.689        | 1.7 (-20.7 to 24.2)          | 0.877        | <b>21.6 (10.7 to 32.4)</b>  | <b>&lt; 0.001</b> |
| Comorbid                                                       |                           |              |                              |              |                             |                   |
| No (hypertension only)                                         | -                         | -            | -                            | -            | -                           | -                 |
| Yes (hypertension and diabetes)                                | <b>17.3 (3.7 to 30.9)</b> | <b>0.013</b> | -0.7 (-20.2 to 18.9)         | 0.947        | -1.3 (-16.1 to 13.4)        | 0.858             |

**Table S3B. Unadjusted and adjusted difference-in-difference regression results, by HealthRise grantee, for diabetes patients.**

|                                                                | Hennepin                    |                 | Ramsey                     |                 | Rice                 |                 |
|----------------------------------------------------------------|-----------------------------|-----------------|----------------------------|-----------------|----------------------|-----------------|
|                                                                | Coefficient (95% CI)        | <i>p</i> -value | Coefficient (95% CI)       | <i>p</i> -value | Coefficient (95% CI) | <i>p</i> -value |
| <b>Diabetes</b>                                                |                             |                 |                            |                 |                      |                 |
| <b>Change in A1c (%)</b>                                       |                             |                 |                            |                 |                      |                 |
| <b>Unadjusted model</b>                                        |                             |                 |                            |                 |                      |                 |
| HealthRise-endline interaction                                 | <b>-0.7 (-1.3 to -0.09)</b> | <b>0.024</b>    | <b>-1.4 (-2.4 to -0.5)</b> | <b>0.004</b>    | -0.02 (-0.5 to 0.4)  | 0.943           |
| <b>Adjusted model</b>                                          |                             |                 |                            |                 |                      |                 |
| HealthRise-endline interaction                                 | <b>-0.7 (-1.3 to -0.08)</b> | <b>0.026</b>    | <b>-1.4 (-2.4 to -0.5)</b> | <b>0.004</b>    | -0.02 (-0.5 to 0.4)  | 0.943           |
| Age                                                            |                             |                 |                            |                 |                      |                 |
| < 50 years                                                     | -                           | -               | -                          | -               | -                    | -               |
| ≥ 50 years                                                     | <b>-1.3 (-2.4 to -0.1)</b>  | <b>0.033</b>    | 0.1 (-0.8 to 0.5)          | 0.802           | -0.08 (-0.6 to 0.4)  | 0.743           |
| Sex                                                            |                             |                 |                            |                 |                      |                 |
| Male                                                           | -                           | -               | -                          | -               | -                    | -               |
| Female                                                         | 0.2 (-0.7 to 1.2)           | 0.637           | -0.09 (-0.9 to 0.7)        | 0.820           | -0.08 (-0.5 to 0.4)  | 0.723           |
| Duration from baseline to endline                              |                             |                 |                            |                 |                      |                 |
| < 12 months                                                    | -                           | -               | -                          | -               | -                    | -               |
| ≥ 12 months                                                    | 0.1 (-1.7 to 1.4)           | 0.875           | 0.2 (-0.8 to 1.2)          | 0.683           | 0.2 (-0.3 to 0.6)    | 0.480           |
| Comorbid                                                       |                             |                 |                            |                 |                      |                 |
| No (diabetes only)                                             | -                           | -               | -                          | -               | -                    | -               |
| Yes (hypertension and diabetes)                                | 0.1 (-1.1 to 1.3)           | 0.851           | -0.5 (-1.4 to 0.3)         | 0.207           | 0.08 (-0.3 to 0.5)   | 0.707           |
| <b>Change in patients meeting treatment targets (% points)</b> |                             |                 |                            |                 |                      |                 |
| <b>Unadjusted model</b>                                        |                             |                 |                            |                 |                      |                 |
| HealthRise-endline interaction                                 | <b>21.7 (6.4 to 36.9)</b>   | <b>0.006</b>    | <b>19.1 (0.2 to 38.1)</b>  | <b>0.048</b>    | 2.1 (-9.3 to 13.6)   | 0.714           |
| <b>Adjusted model</b>                                          |                             |                 |                            |                 |                      |                 |
| HealthRise-endline interaction                                 | <b>21.7 (6.3 to 37.1)</b>   | <b>0.006</b>    | 19.1 (0.0 to 38.0)         | 0.050           | 2.1 (-9.3 to 13.6)   | 0.715           |
| Age                                                            |                             |                 |                            |                 |                      |                 |
| < 50 years                                                     | -                           | -               | -                          | -               | -                    | -               |
| ≥ 50 years                                                     | 12.4 (-6.7 to 31.5)         | 0.201           | 3.9 (-9.6 to 17.3)         | 0.568           | -3.8 (-13.7 to 6.2)  | 0.456           |
| Sex                                                            |                             |                 |                            |                 |                      |                 |
| Male                                                           | -                           | -               | -                          | -               | -                    | -               |
| Female                                                         | -9.2 (-26.8 to 8.4)         | 0.301           | -2.0 (-14.6 to 10.7)       | 0.758           | 0.2 (-8.9 to 9.3)    | 0.967           |
| Duration from baseline to endline                              |                             |                 |                            |                 |                      |                 |
| < 12 months                                                    | -                           | -               | -                          | -               | -                    | -               |
| ≥ 12 months                                                    | -1.2 (-25.3 to 22.7)        | 0.916           | 0.8 (-14.6 to 16.2)        | 0.919           | -1.8 (-11.6 to 7.9)  | 0.712           |
| Comorbid                                                       |                             |                 |                            |                 |                      |                 |
| No (diabetes only)                                             | -                           | -               | -                          | -               | -                    | -               |
| Yes (hypertension and diabetes)                                | 3.0 (-20.2 to 26.2)         | 0.798           | 3.2 (-9.7 to 16.2)         | 0.621           | 1.0 (-8.2 to 10.3)   | 0.823           |
